# Supplementary material
Source: publisher figshare collection journal article supplement (https://acs.figshare.com/ndownloader/files/5362946)
Supplement: Supplementary file 1 [file 5362946]

## Supporting Information

# Tough and Thermosensitive Poly(*N*-isopropylacrylamide)/Graphene Oxide Hydrogels with Macroscopically Oriented Liquid Crystalline Structures

*Zhongcheng Zhu,<sup>†</sup> Yang Li,<sup>†</sup> Hui Xu,<sup>†</sup> Xin Peng,<sup>†</sup> Ya-Nan Chen,<sup>†</sup> Cong Shang,<sup>†</sup> Qin*

*Zhang,<sup>†</sup> Jiaqi Liu<sup>‡</sup> and Huiliang Wang<sup>\*†</sup>*

<sup>†</sup>Beijing Key Laboratory of Energy Conversion and Storage Materials, College of  
Chemistry, Beijing Normal University, Beijing 100875, P. R. China.

\*E-mail: wanghl@bnu.edu.cn (H. Wang)

<sup>‡</sup>Department of Chemistry, Capital Normal University, Beijing 100048, P. R. China

## Supporting Figures

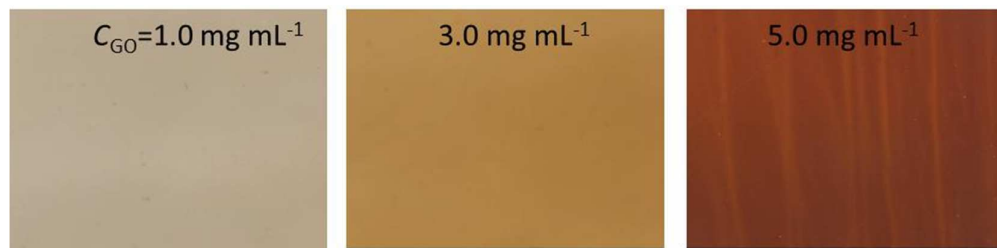

**Figure S1.** Photographs of PNIPAM/GO nanocomposite hydrogels with different GO concentrations.

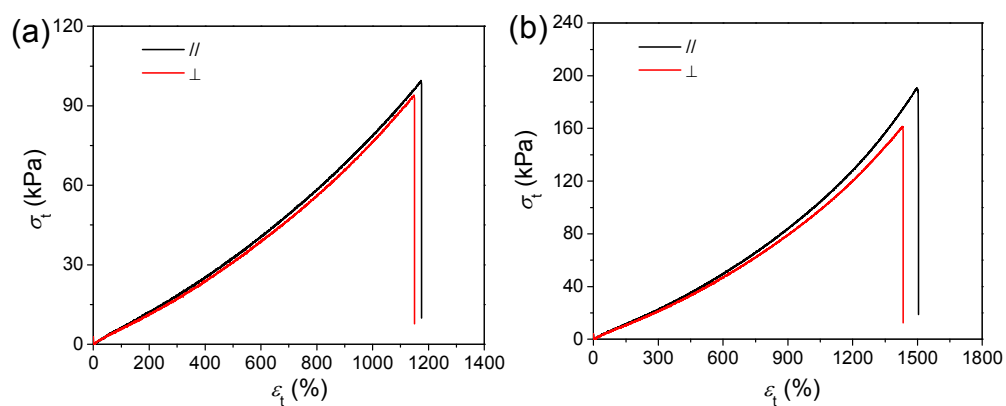

**Figure S2.** Tensile strain-stress curves of PNIPAM/GO hydrogels prepared with GO concentrations of 1.0 (a) and 3.0  $\text{mg mL}^{-1}$  (b) in the directions parallel and perpendicular to flow field direction.

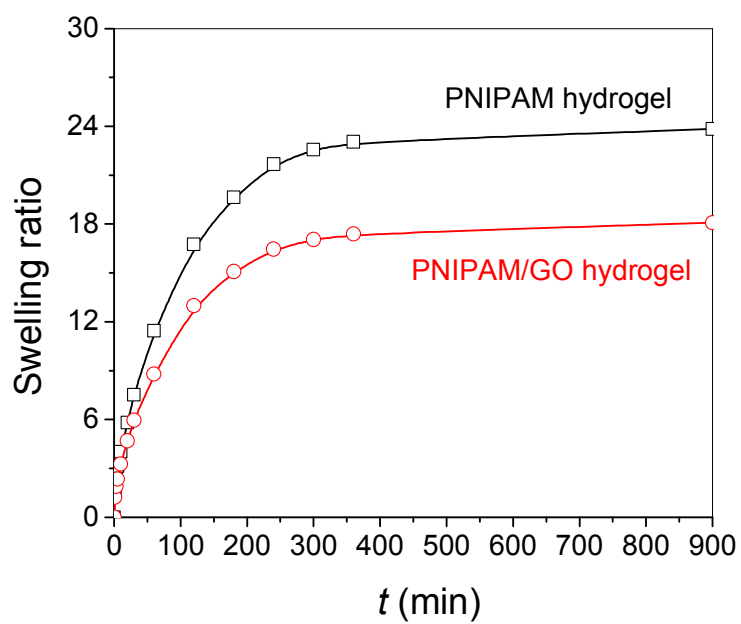

**Figure S3.** The swelling curves of the PNIPAM gel and the PNIPAM/GO gel ( $C_{GO}=5.0 \text{ mg mL}^{-1}$ ) at  $20^{\circ}\text{C}$ .

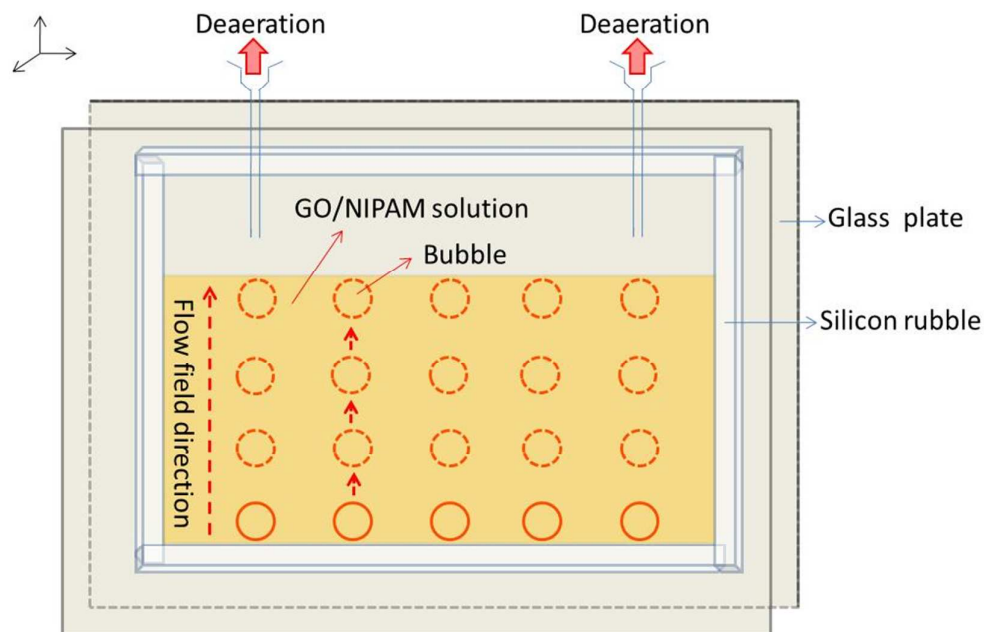

**Figure S4.** Schematic diagram of preparation of PNIPAM/GO nanocomposite hydrogels.

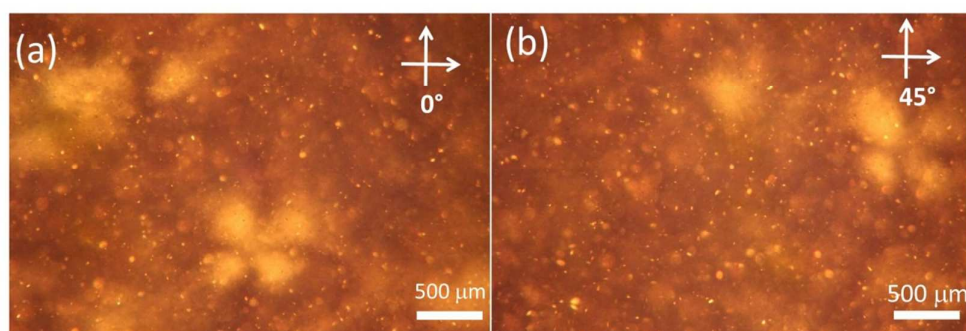

**Figure S5.** Crossed POM images of the PNIPAM/GO hydrogel ( $C_{GO} = 5.0 \text{ mg mL}^{-1}$ ) prepared without degassing process at the rotation angles of  $0^\circ$  (a) and  $45^\circ$  (b).

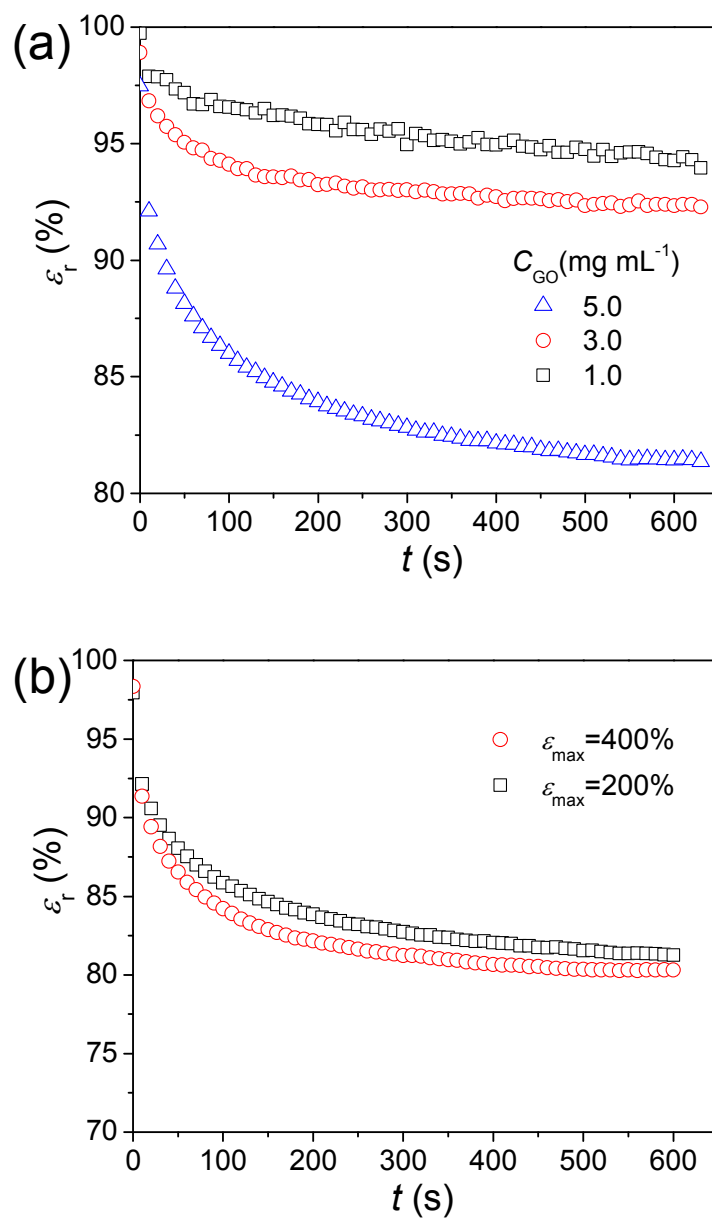

**Figure S6.** (a) Stress relaxation curves of the PNIPAM/GO hydrogels prepared with different GO concentrations elongated to the maximum strain ( $\varepsilon_{max}$ ) of 200%, and (b) those for the PNIPAM/GO hydrogel ( $C_{GO} = 5.0$  mg mL<sup>-1</sup>) elongated to different  $\varepsilon_{max}$ .  $\varepsilon_r$  is defined as the ratio of remaining stress at time ( $t$ ) ( $\sigma_t$ ) to the original stress ( $\sigma_0$ ) at a given  $\varepsilon_{max}$  [ $100 \times (\sigma_t / \sigma_0)$  (%)].

## **Supporting Movies**

**Movie S1.** Very fast real time reversible LC behavior under laser irradiation (532 nm, 5 mW).

**Movie S2.** The real time thermoresponsive and reversible LC behavior in the elongated gel.

**Movie S3.** Rotation of the dried elongated gel under polarized light.
